# Supplementary material for: Molecular dynamics simulations of the impurity effect on packing structures, local stresses, and thermodynamics of Ih silver clusters
Source: Royal Society of Chemistry journal article supplement (doi:10.1039/d2cp02814j), 2022-01-01
Supplement: d2cp02814j3.pdf [file d2cp02814j3.pdf]

Ag 55  
ocl 0.0000  
Ag -1.892035 -4.048667 -9.879029  
Ag -3.613719 -7.090572 -5.091103  
Ag -6.168910 -2.037385 -6.694702  
Ag -5.083448 -9.561458 -1.483321E-01  
Ag -7.822725 -4.841742 -1.779797  
Ag -10.295820 8.821262E-02 -3.449095  
Ag -6.564075 -5.782184 3.858076  
Ag -9.190885 -6.929663E-01 2.033427  
Ag -7.620367 -1.707064 7.523093  
Ag 2.057721 -6.560672 -6.413820  
Ag -2.115710 1.522737 -9.119550  
Ag 4.873381E-01 -9.160856 -1.575633  
Ag -9.108220E-01 -2.117167 -4.950336  
Ag -6.459248 3.668931 -5.864686  
Ag -2.570229 -4.787281 -1.001919E-01  
Ag -5.119699 6.557940E-02 -1.732106  
Ag -1.355600 -8.585376 3.982709  
Ag -3.796222 -9.227794E-01 3.761388  
Ag -8.429915 4.448619 -4.416464E-01  
Ag -2.677592 -4.497698 7.954481  
Ag -7.056339 3.442227 5.230824  
Ag 5.962144 -8.644214 -2.787753  
Ag 2.970193 -1.299309 -8.826417  
Ag -2.402234 7.200244 -7.952217  
Ag 3.021920 -4.304851 -1.382470  
Ag -1.167731 3.604861 -4.065621  
Ag 4.294925 -8.108971 2.744407  
Ag -8.987841E-03 -3.610796E-03 4.796450E-03  
Ag -4.170821 7.954503 -2.596542

|    |               |               |              |
|----|---------------|---------------|--------------|
| Ag | 1.228450      | -3.543646     | 3.980005     |
| Ag | -3.037406     | 4.305444      | 1.401105     |
| Ag | 2.546402      | -7.091144     | 7.962253     |
| Ag | -3.077898     | 1.131134      | 8.889888     |
| Ag | -6.217020     | 8.485091      | 2.836453     |
| Ag | 6.961486      | -3.498680     | -5.264497    |
| Ag | 2.785602      | 4.456875      | -8.011350    |
| Ag | 8.331474      | -4.529181     | 2.917174E-01 |
| Ag | 3.834468      | 8.761575E-01  | -3.804787    |
| Ag | 1.370411      | 8.595193      | -3.933149    |
| Ag | 5.124294      | -6.823625E-02 | 1.785109     |
| Ag | 2.628629      | 4.754227      | 1.254281E-01 |
| Ag | 6.716581      | -3.651027     | 5.700341     |
| Ag | 8.411925E-01  | 2.002321      | 5.023701     |
| Ag | -4.432307E-01 | 9.305486      | 1.662513     |
| Ag | 2.229683      | -1.579171     | 9.107465     |
| Ag | -2.165289     | 6.459789      | 6.479574     |
| Ag | 7.565835      | 1.668338      | -7.680628    |
| Ag | 9.072600      | 8.400780E-01  | -2.136249    |
| Ag | 6.470993      | 5.842371      | -3.701681    |
| Ag | 10.335790     | 3.442940E-02  | 3.230441     |
| Ag | 7.947489      | 4.911986      | 1.773588     |
| Ag | 4.995686      | 9.726466      | 2.528273E-01 |
| Ag | 6.189847      | 2.156303      | 6.750073     |
| Ag | 3.538095      | 6.996736      | 5.183403     |
| Ag | 1.923170      | 4.171329      | 9.857404     |

Ag 147

ocl 0.0000

|    |            |           |          |
|----|------------|-----------|----------|
| Ag | -13.563420 | -3.194893 | 3.895372 |
|----|------------|-----------|----------|

|    |           |           |          |
|----|-----------|-----------|----------|
| Ag | -5.633672 | -5.763034 | 4.057241 |
|----|-----------|-----------|----------|

|    |               |              |               |
|----|---------------|--------------|---------------|
| Ag | -11.854310    | 8.698536     | 1.554337      |
| Ag | -2.074426E-01 | -4.467360    | -1.665235     |
| Ag | 10.221740     | 5.970222     | -7.593733     |
| Ag | 12.531430     | -6.942153    | -1.127098     |
| Ag | -3.252922     | 1.894113     | 4.302939      |
| Ag | -4.609401     | -1.649004    | -1.400454E-01 |
| Ag | 6.532478      | 6.765475     | -3.614868     |
| Ag | -6.869867     | -9.739627    | 7.867932      |
| Ag | 4.370079      | -8.031076    | -3.174959E-01 |
| Ag | 6.620275      | -2.090491    | 6.830910      |
| Ag | -5.250688     | 7.362628     | -9.857904     |
| Ag | 3.100845      | 2.730882     | -12.909130    |
| Ag | -10.763610    | -8.333028    | 3.931849      |
| Ag | 14.865150     | 1.915510     | 2.098931      |
| Ag | 12.456940     | 6.191373     | 5.944437      |
| Ag | 1.118722      | 15.927770    | 5.942901      |
| Ag | 13.353430     | -9.080064    | 4.080106      |
| Ag | 9.008896      | 1.799235     | -3.607844     |
| Ag | 1.293118      | 9.748549     | -1.710815     |
| Ag | 7.992303      | 9.111728     | 7.466933      |
| Ag | 4.413542      | -13.265720   | -2.228049     |
| Ag | 5.778759      | 13.314380    | 4.279240      |
| Ag | -4.734438     | 3.949397     | 13.318000     |
| Ag | -2.781502     | -10.967890   | 11.500320     |
| Ag | -6.260511     | 3.149070     | -6.197145     |
| Ag | -11.674530    | -4.986273    | -5.426228     |
| Ag | -1.743539     | 3.692530E-02 | -4.864100     |
| Ag | -6.605732     | 8.279343     | 10.069740     |
| Ag | -7.765859     | 4.951345     | 3.082515      |
| Ag | 5.634242      | -6.129816    | 10.439010     |
| Ag | 4.860426      | 3.299721     | -7.634397     |

|    |               |               |              |
|----|---------------|---------------|--------------|
| Ag | -7.416886     | 11.184840     | -6.071246    |
| Ag | -7.615559     | -8.220289E-01 | 12.344010    |
| Ag | 8.832641      | -1.221396     | 11.717040    |
| Ag | -8.175512     | 7.156385      | -2.303945    |
| Ag | -6.073956     | -11.165840    | 1.899583     |
| Ag | -7.220573     | -7.772272     | -7.293600    |
| Ag | -7.406530E-01 | -3.177166     | 3.786459     |
| Ag | 5.097522E-01  | 5.709433      | 2.174612     |
| Ag | -7.614884E-01 | 7.839362      | 11.420120    |
| Ag | 7.112947      | 10.892430     | -7.065769    |
| Ag | 11.662740     | 9.443080      | -3.120516    |
| Ag | -2.831836     | 3.024057      | -13.567690   |
| Ag | -7.509552     | 10.525410     | 4.787362     |
| Ag | 7.602726      | -10.170470    | 6.774601     |
| Ag | -11.221550    | 6.505737      | 7.141780     |
| Ag | 13.227780     | -1.490426     | -2.204235    |
| Ag | -5.964046     | -1.267117     | -14.861510   |
| Ag | -2.235505     | -12.439270    | 5.749511     |
| Ag | -1.074902     | -8.547742     | 2.102978     |
| Ag | 15.377080     | 7.488527      | 1.006782     |
| Ag | 3.527090      | -1.983172     | 14.227050    |
| Ag | -9.608656     | -4.477557     | 8.228089     |
| Ag | -8.848760     | -2.992358     | -10.127550   |
| Ag | -4.102894     | -5.888154     | -12.025560   |
| Ag | -6.814486     | -2.462950     | -5.056866    |
| Ag | 3.071219      | -12.129660    | 3.704529     |
| Ag | 1.329576      | 4.598083      | -3.408954    |
| Ag | -13.160920    | 4.673880      | -2.719745    |
| Ag | 3.274200E-01  | -6.583230     | 13.040800    |
| Ag | -12.952900    | 2.670082      | 2.756714     |
| Ag | 5.234089      | 2.972147      | 3.523727E-01 |

|    |              |               |              |
|----|--------------|---------------|--------------|
| Ag | -14.081040   | -1.317462     | -1.792299    |
| Ag | 4.649349     | -2.695370     | 1.671470     |
| Ag | -9.146020    | 1.337016      | -1.446573    |
| Ag | -4.319777    | -2.198970     | 8.096634     |
| Ag | -10.505040   | 6.438643      | -7.441228    |
| Ag | 5.087409     | 7.153301      | 12.097590    |
| Ag | 9.917334E-01 | 3.533024      | 14.375470    |
| Ag | -2.105591    | -1.389863     | 13.470220    |
| Ag | 2.456348     | 6.502360      | 7.183039     |
| Ag | -10.032650   | -9.591041     | -1.932851    |
| Ag | 3.248518     | 11.533210     | 9.081163     |
| Ag | 7.404013     | -6.913029     | -9.762980    |
| Ag | 8.687963     | -5.975571     | 3.237248     |
| Ag | -2.362333    | -5.364766     | -6.805155    |
| Ag | -8.136171    | 2.771629      | -11.372190   |
| Ag | -3.074278    | 6.980966      | 6.341946     |
| Ag | 1.500320     | -6.518800     | -10.985230   |
| Ag | 3.982653     | -7.462363E-01 | -3.661431    |
| Ag | -2.080459    | 11.948860     | -8.515551    |
| Ag | -4.921329    | -12.036760    | -4.055396    |
| Ag | 1.950652     | 13.983070     | -5.201797    |
| Ag | 1.660798     | 14.893790     | 4.987404E-01 |
| Ag | 7.476879     | -1.850523     | -7.696370    |
| Ag | -11.982260   | 8.544792E-01  | 8.027295     |
| Ag | -3.840714    | -7.369393E-01 | -9.808393    |
| Ag | -2.805016    | 12.075780     | 8.133299     |
| Ag | 14.050970    | -3.687409     | 3.489531     |
| Ag | 10.972720    | -5.404291     | 8.215068     |
| Ag | 2.344441     | -10.656530    | 8.993030     |
| Ag | 4.497327     | 1.809180      | 10.131920    |
| Ag | 6.599509     | 2.568602      | 15.116310    |

|    |               |               |               |
|----|---------------|---------------|---------------|
| Ag | 5.640132      | 7.396545      | -11.157040    |
| Ag | -9.584923E-01 | -13.747650    | 1.498570E-01  |
| Ag | 12.659030     | 5.753402E-01  | -7.688110     |
| Ag | 6.328410      | 12.164610     | -1.470918     |
| Ag | -3.095374     | 7.853409      | -4.763469     |
| Ag | -3.124612     | 13.203910     | -2.738400     |
| Ag | 1.259672      | -2.784592     | 9.161535      |
| Ag | -1.151012     | 2.417835      | 9.352065      |
| Ag | -1.671114     | -7.250025     | 7.662062      |
| Ag | 2.149645      | 8.568983      | -6.994288     |
| Ag | 1.722906E-01  | 8.310478      | -12.231460    |
| Ag | -3.944335     | 3.781715      | -1.098204     |
| Ag | 10.820100     | -3.043860     | -11.854590    |
| Ag | -6.557561E-03 | -9.576359     | -3.651211     |
| Ag | 11.845250     | -5.186471     | -6.577254     |
| Ag | 10.651380     | 10.361230     | 2.654697      |
| Ag | 3.325113      | -6.722998     | 5.326187      |
| Ag | -1.903978     | -10.526290    | -8.822804     |
| Ag | -8.191927     | 12.510080     | -5.422568E-01 |
| Ag | 7.591923      | 3.627204      | 5.460977      |
| Ag | -8.298945     | -7.486156E-01 | 3.951408      |
| Ag | -6.878812     | 2.909544      | 8.385254      |
| Ag | -12.584020    | 10.281710     | -3.746274     |
| Ag | -3.517429     | 14.341570     | 3.023041      |
| Ag | 3.685361      | -10.875150    | -8.037610     |
| Ag | 11.880560     | 2.406658E-01  | 7.118190      |
| Ag | -3.830894     | 9.083547      | 8.728495E-01  |
| Ag | 5.609857      | 8.078583      | 2.196754      |
| Ag | 14.248510     | 4.048755      | -3.446528     |
| Ag | 4.337948E-01  | 5.624556E-01  | 1.725172E-01  |
| Ag | -9.553914     | -4.424357     | -4.947712E-02 |

|    |               |               |               |
|----|---------------|---------------|---------------|
| Ag | 8.108188      | -4.071294     | -2.316242     |
| Ag | 4.069424E-02  | -14.566920    | -5.478334     |
| Ag | 9.745120      | 4.440021      | 10.730220     |
| Ag | 8.127899      | -9.431444     | -4.490330     |
| Ag | 9.702462      | -5.789564E-01 | 1.965954      |
| Ag | 3.192300      | 12.710560     | -10.583040    |
| Ag | -14.553690    | -6.800403     | -3.677769E-01 |
| Ag | -7.047949E-01 | 4.074551      | -8.553679     |
| Ag | -4.981973     | -7.078385     | -1.837051     |
| Ag | -11.379540    | 6.826158E-01  | -6.680908     |
| Ag | 10.431590     | 5.155781      | 7.453703E-01  |
| Ag | 1.865078      | -1.184042     | -8.943264     |
| Ag | -3.637710E-01 | -1.925772     | -13.971130    |
| Ag | -5.247970     | -5.880525     | 12.010180     |
| Ag | 3.583097      | -5.813199     | -5.758973     |
| Ag | 5.430487      | -2.415418     | -13.114230    |
| Ag | 8.683395      | -10.967620    | 1.128308      |
| Ag | 7.311505E-01  | 10.819760     | 4.117845      |
| Ag | -10.355010    | 4.425209      | 12.312520     |
| Ag | 8.677776      | 2.238133      | -11.458790    |
| Ag | 2.626834      | 1.391285      | 5.017454      |
